# Supplementary material
Source: publisher figshare collection journal article supplement (https://acs.figshare.com/ndownloader/files/10162494)
Supplement: Supplementary file 1 [file 10162494]

# Supporting Information

## 3D Printing of PDMS Improves its Mechanical and Cell Adhesion Properties

*Veli Ozbolat<sup>1,2,3</sup>, Madhuri Dey<sup>2,4</sup>, Bugra Ayan<sup>1,2</sup>, Adomas Povilianskas<sup>1</sup>, Melik C. Demirel<sup>1,2,6</sup>  
and Ibrahim T. Ozbolat<sup>1,2,5,6,\*</sup>*

<sup>1</sup>Engineering Science and Mechanics Department, Penn State University, University Park, PA 16802, USA,

<sup>2</sup>The Huck Institutes of the Life Sciences, Penn State University, University Park, PA 16802, USA,

<sup>3</sup>Mechanical Engineering Department, Ceyhan Engineering Faculty, Cukurova University, Adana 01950, Turkey,

<sup>4</sup>Chemistry Department, Penn State University, University Park, PA 16802, USA,

<sup>5</sup>Biomedical Engineering Department, Penn State University, University Park, PA 16802, USA,

<sup>6</sup>Materials Research Institute, Penn State University, University Park, PA 16802, USA,

\* Corresponding author, Email: [ito1@psu.edu](mailto:ito1@psu.edu)

3 Pages total

2 Figures

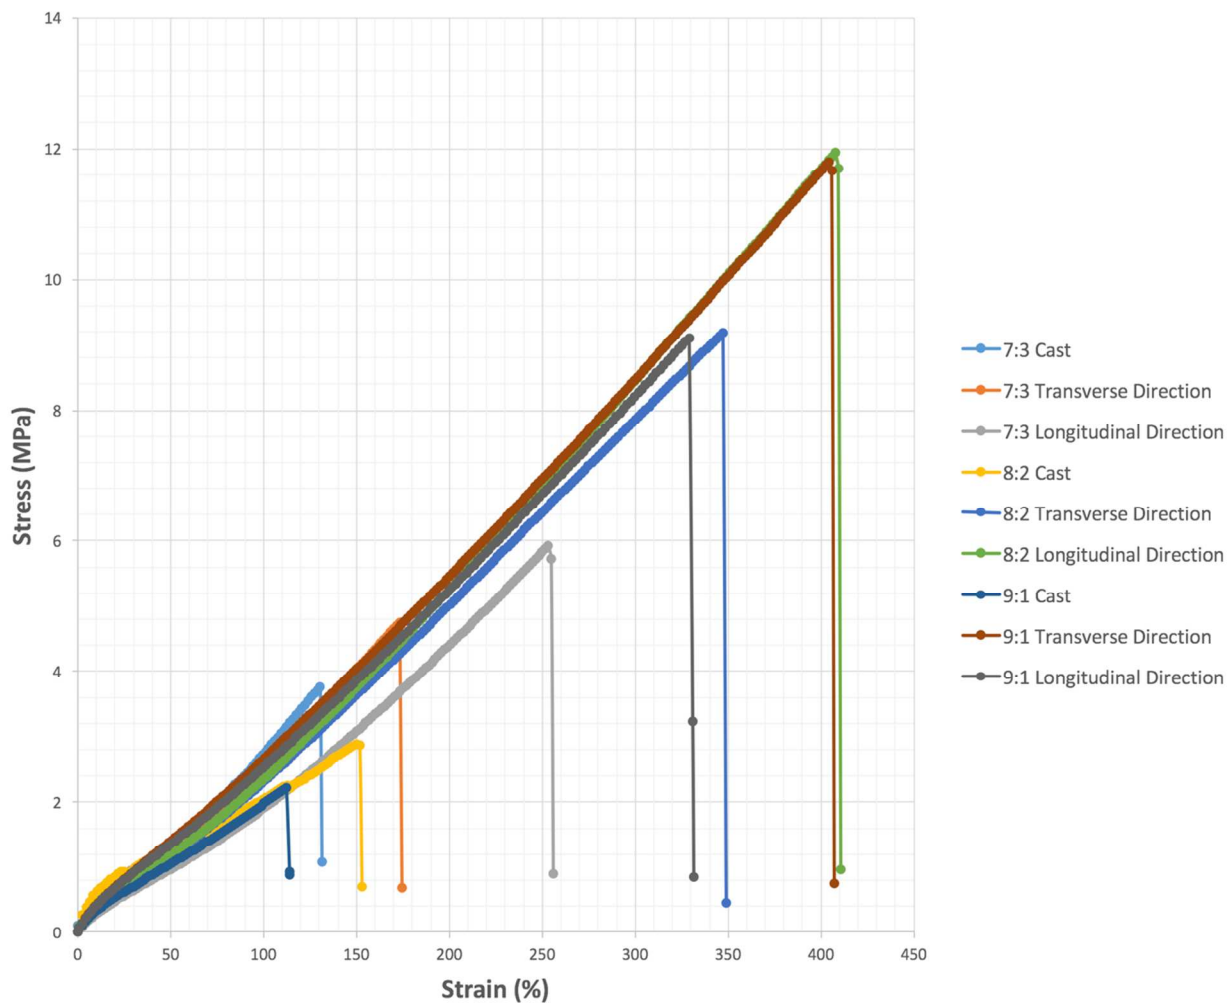

**Figure S1:** Representative stress-strain curves of dogbone samples.

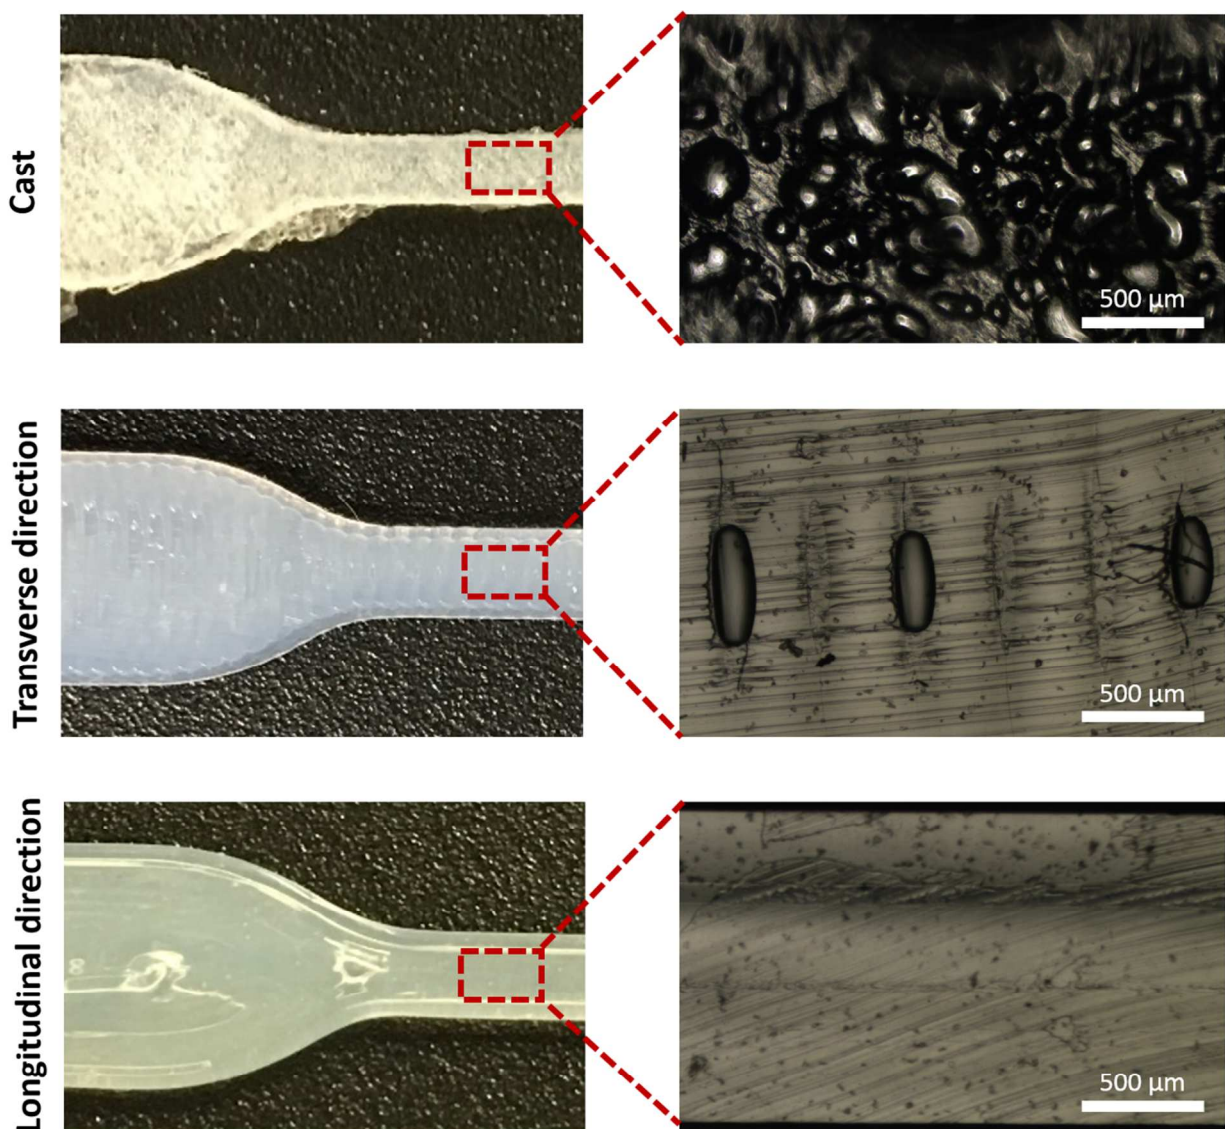

**Figure S2.** Representative microscopic images of tested dogbone samples (Ink 9:1) showing pores in their neck section. Cast samples (top-right image) show considerable number of large pores while printed ones exhibit small pores. Large (but a very few in quantity) void sections were also observed between the fibers of samples printed in transverse direction (middle-right image).
